# Supplementary material
Source: PubMed Central journal article supplement (PMC6832748)
Supplement: NIHMS1048388-supplement-Supplemental.pdf [file NIHMS1048388-supplement-Supplemental.pdf]

**S1 Figure a.** Search strategy for MEDLINE via Ovid

((((Endometrium/ or Uterine Neoplasms/ or Endometrial Neoplasms/ or endometrial.mp. or Adenocarcinoma/) OR (endometri\*.mp.) OR (uteri\*.mp))) AND ((cancer.mp. or Neoplasms/) OR (neoplasm\*.mp.) OR (cancer\*.mp.) OR (tumor\*.mp.) OR (malignanc\*.mp.) OR (neoplasia.mp.)) ) AND (((bariatric surgery.mp. or Bariatric Surgery/ or Biliopancreatic Diversion/) OR (jejunoileal bypass\*.mp.) OR (bariatric surger\*.mp.) OR (vertical banded gastroplast\*.mp.) OR (vertical sleeve gastrectomy.mp.) OR (gastric bypass\*.mp.) OR (Roux-en-Y anastomosis.mp.) OR (Roux-en-Y gastric bypass.mp.) OR (Anastomosis, Roux-en-Y/) OR (gastric banding.mp.)) OR ((weight loss.mp. or Weight Loss/) OR (weight control.mp. or Diet, Reducing/) OR (weight management.mp.) OR (Energy Intake/ or Caloric Restriction/ or caloric restrict.mp.) OR (diet.mp. or Diet/) OR (physical activity.mp. or Exercise/) OR (exercise\*.mp.) OR (sport\*.mp.) OR (Physical Fitness/ or Exercise Therapy/ or fitness.mp.)))

## S1 Figure b. Search strategies for Embase

Embase®

### Embase Session Results

| No. | Query                                                                                                                                                                                                                                                                                                                                                                             | Results   |
|-----|-----------------------------------------------------------------------------------------------------------------------------------------------------------------------------------------------------------------------------------------------------------------------------------------------------------------------------------------------------------------------------------|-----------|
| #38 | #37 AND 'hum an'/de AND (2000:py OR2001:py OR 2002:py OR 2003:py OR 2004:py OR 2005:py OR 2006:py OR 2007:py OR 2008:py OR 2009:py OR 2010:py OR 2011:py OR 2012:py OR 2013:py OR 2014:py OR 2015:py OR 2016:py OR 2017:py OR 2018:py)AND [embase]/lim NOT [em base]/lim AND [medline]/lim )AND [female]/lim AND ('article'/it OR 'article in press'/it OR 'conference paper'/it) | 335       |
| #37 | #35 AND #36                                                                                                                                                                                                                                                                                                                                                                       | 4,873     |
| #36 | #11 OR #24                                                                                                                                                                                                                                                                                                                                                                        | 1,577,604 |
| #35 | #27 AND #34                                                                                                                                                                                                                                                                                                                                                                       | 198,638   |
| #34 | #28 OR #29 OR #30 OR #31 OR #32 OR #33                                                                                                                                                                                                                                                                                                                                            | 4,904,739 |
| #33 | neoplasia                                                                                                                                                                                                                                                                                                                                                                         | 75,800    |
| #32 | malignanc*                                                                                                                                                                                                                                                                                                                                                                        | 322,559   |
| #31 | tum or*                                                                                                                                                                                                                                                                                                                                                                           | 2,764,003 |
| #30 | cancer*                                                                                                                                                                                                                                                                                                                                                                           | 3,525,476 |
| #29 | neoplasm*                                                                                                                                                                                                                                                                                                                                                                         | 963,778   |
| #28 | 'neoplasm'                                                                                                                                                                                                                                                                                                                                                                        | 814,141   |
| #27 | #25 OR #26                                                                                                                                                                                                                                                                                                                                                                        | 380,441   |
| #26 | uterine                                                                                                                                                                                                                                                                                                                                                                           | 278,928   |
| #25 | endometri*                                                                                                                                                                                                                                                                                                                                                                        | 143,234   |
| #24 | #12 OR #13 OR #14 OR #15 OR #16 OR #17 OR #18 OR #19 OR #20 OR #21 OR #22 OR #23                                                                                                                                                                                                                                                                                                  | 1,553,073 |
| #23 | 'fitness'                                                                                                                                                                                                                                                                                                                                                                         | 87,043    |
| #22 | sport*                                                                                                                                                                                                                                                                                                                                                                            | 254,835   |
| #21 | 'exercise'                                                                                                                                                                                                                                                                                                                                                                        | 465,737   |
| #20 | exercise*                                                                                                                                                                                                                                                                                                                                                                         | 490,378   |
| #19 | 'physical activity'                                                                                                                                                                                                                                                                                                                                                               | 170,963   |
| #18 | 'diet'                                                                                                                                                                                                                                                                                                                                                                            | 646,524   |
| #17 | 'caloric restriction'                                                                                                                                                                                                                                                                                                                                                             | 16,114    |
| #16 | 'w eight management'                                                                                                                                                                                                                                                                                                                                                              | 7,845     |
| #15 | 'w eight control'                                                                                                                                                                                                                                                                                                                                                                 | 10,324    |
| #14 | 'w eight reduction'                                                                                                                                                                                                                                                                                                                                                               | 150,809   |
| #13 | 'w eight loss program'                                                                                                                                                                                                                                                                                                                                                            | 2,697     |
| #12 | weight AND loss                                                                                                                                                                                                                                                                                                                                                                   | 169,741   |
| #11 | #1 OR #2 OR #3 OR #4 OR #5 OR #6 OR #7 OR #8 OR #9 OR #10                                                                                                                                                                                                                                                                                                                         | 49,295    |
| #10 | 'biliopancreatic bypass'                                                                                                                                                                                                                                                                                                                                                          | 2,780     |
| #9  | 'roux y anastom osis'                                                                                                                                                                                                                                                                                                                                                             | 8,388     |
| #8  | 'roux-en-y gastric bypass'                                                                                                                                                                                                                                                                                                                                                        | 10,190    |
| #7  | 'gastric banding'                                                                                                                                                                                                                                                                                                                                                                 | 7,234     |
| #6  | gastric AND bypass*                                                                                                                                                                                                                                                                                                                                                               | 22,441    |
| #5  | 'vertical sleeve gastrectomy'                                                                                                                                                                                                                                                                                                                                                     | 413       |
| #4  | vertical AND banded AND gast roplast *                                                                                                                                                                                                                                                                                                                                            | 1,151     |
| #3  | bariatric AND surger*                                                                                                                                                                                                                                                                                                                                                             | 33,154    |
| #2  | jejunoileal AND bypass*                                                                                                                                                                                                                                                                                                                                                           | 1,432     |
| #1  | 'bariatric surgery'                                                                                                                                                                                                                                                                                                                                                               | 30,740    |

ELSEVIER

<https://www.embase.com/search/results>

1/2

## S1 Figure c. Search strategies for Cochrane Central Register of Controlled Trials

Description:

| ID  | Search                                                                                                                                            | Hits   |
|-----|---------------------------------------------------------------------------------------------------------------------------------------------------|--------|
| #1  | endometri*                                                                                                                                        | 7149   |
| #2  | uterine                                                                                                                                           | 12154  |
| #3  | #1 or #2 Publication Year from 2000 to 2018 (Word variations have been searched)                                                                  | 10498  |
| #4  | MeSH descriptor: [Neoplasms] explode all trees                                                                                                    | 63832  |
| #5  | neoplasm*                                                                                                                                         | 66788  |
| #6  | cancer*                                                                                                                                           | 126704 |
| #7  | tumor*                                                                                                                                            | 44850  |
| #8  | malignanc*                                                                                                                                        | 8994   |
| #9  | neoplasia                                                                                                                                         | 2183   |
| #10 | #4 or #5 or #6 or #7 or #8 or #9                                                                                                                  | 156010 |
| #11 | #3 and #10 Publication Year from 2000 to 2018 (Word variations have been searched)                                                                | 4023   |
| #12 | MeSH descriptor: [Weight Loss] explode all trees                                                                                                  | 4946   |
| #13 | MeSH descriptor: [Exercise] explode all trees                                                                                                     | 20493  |
| #14 | MeSH descriptor: [Diet] explode all trees                                                                                                         | 16346  |
| #15 | weight control                                                                                                                                    | 31190  |
| #16 | weight loss                                                                                                                                       | 18807  |
| #17 | weight management                                                                                                                                 | 0      |
| #18 | caloric restriction                                                                                                                               | 1786   |
| #19 | physical activity                                                                                                                                 | 25600  |
| #20 | exercise*                                                                                                                                         | 69340  |
| #21 | sport*                                                                                                                                            | 18081  |
| #22 | fitness                                                                                                                                           | 7635   |
| #23 | #12 or #13 or #14 or #15 or #16 or #17 or #18 or #19 or #20 or #21 or #22 Publication Year from 2000 to 2018 (Word variations have been searched) | 88460  |
| #24 | bariatric surger*                                                                                                                                 | 1504   |
| #25 | jejunoileal bypass*                                                                                                                               | 74     |
| #26 | vertical banded gastroplast*                                                                                                                      | 76     |
| #27 | vertical sleeve gastrectomy                                                                                                                       | 29     |
| #28 | gastric bypass*                                                                                                                                   | 1390   |
| #29 | gastric banding                                                                                                                                   | 391    |
| #30 | roux-en-y gastric bypass                                                                                                                          | 686    |
| #31 | roux-en-y anastomosis                                                                                                                             | 340    |
| #32 | biliopancreatic diversion*                                                                                                                        | 92     |
| #33 | MeSH descriptor: [Bariatric Surgery] explode all trees                                                                                            | 1088   |
| #34 | #24 or #25 or #26 or #27 or #28 or #29 or #30 or #31 or #32 or #33 Publication Year from 2000 to 2018 (Word variations have been searched)        | 1923   |
| #35 | #23 or #34 Publication Year from 2000 to 2018                                                                                                     | 89406  |
| #36 | #11 and #35 Publication Year from 2000 to 2018 (Word variations have been searched)                                                               | 166    |
